# Supplementary material
Source: PubMed Central journal article supplement (PMC5682952)
Supplement: 10.1074_C117.818807_jbc.C117.818807-1.pdf [file 10.1074_C117.818807_jbc.C117.818807-1.pdf]

Table S1. List of strains

| <b>Strain</b> | <b>Genotype</b>                       | <b>Source/derivation</b>                            |
|---------------|---------------------------------------|-----------------------------------------------------|
| JW0698-1      | BW25113 $\Delta phr-758::kan$         | CGSC                                                |
| JW1100-1      | BW25113 $\Delta mfd-739::kan$         | CGSC                                                |
| JW3786-5      | BW25113 $\Delta uvrD769::kan$         | CGSC                                                |
| MG1655        | F-, $\lambda$ -, <i>rph-1</i>         | CGSC                                                |
| MGP           | MG1655 $\Delta phr::kan$              | Kan <sup>r</sup> transductant, P1JW0698-1 x MG1655  |
| MPd           | MGP DEL( <i>kan</i> )                 | FLP-mediated deletion of <i>kan</i>                 |
| MPdM          | MPd $\Delta mfd::kan$                 | Kan <sup>r</sup> transductant, P1JW1100-1 x MPd     |
| MPdMd         | MPdM DEL( <i>kan</i> )                | FLP-mediated deletion of <i>kan</i>                 |
| MPdD          | MPd $\Delta uvrD::kan$                | Kan <sup>r</sup> transductant, P1JW3786-5 x MPd     |
| MPdDd         | MPdD DEL( <i>kan</i> )                | FLP-mediated deletion of <i>kan</i>                 |
| CF10237       | MG1655 $\Delta relA256\Delta spoT203$ | M. Cashel (Kamarthapuet al., 2016)                  |
| CFPK          | CF10237 $\Delta phr::kan$             | Kan <sup>r</sup> transductant, P1JW0698-1 x CF10237 |
| CFPd          | CFPK DEL( <i>kan</i> )                | FLP-mediated deletion of <i>kan</i>                 |
| CFPdMK        | CFPd $\Delta mfd::kan$                | Kan <sup>r</sup> transductant, P1JW1100-1 x CFPd    |
| CFPdMd        | CFPdMK DEL( <i>kan</i> )              | FLP-mediated deletion of <i>kan</i>                 |
| CFPdDK        | CFPd $\Delta uvrD::kan$               | Kan <sup>r</sup> transductant, P1JW3786-5 x CFPd    |
| CFPdDd        | CFPdDK DEL( <i>kan</i> )              | FLP-mediated deletion of <i>kan</i>                 |

CGSC, Coli Genetic Stock Center; Kan<sup>r</sup>, kanamycin resistant; FLP-mediated deletion by transient transformation with pCP20
